# Supplementary material for: Extreme suction attachment performance from specialised insects living in mountain streams (Diptera: Blephariceridae)
Source: eLife. 2021 Nov 3;10:e63250. doi: 10.7554/eLife.63250 (PMC8565926; doi:10.7554/eLife.63250)
Supplement: Figure 4—source data 1. [file elife-63250-fig4-data1.csv]

ID	Species	Collection	Surface	Orientation	Safety_Factor	Max_Force
HL11	HL	1	SH	H	1006.95	20.74
HL12	HL	1	SH	H	1427.6	15.4
HL13	HL	1	SH	H	1153.7	18.33
HL14	HL	1	SH	H	1160.92	24.48
HL15	HL	1	SH	H	1131.19	15.31
HL16	HL	1	SH	H	1427.6	12.88
HL17	HL	1	SH	H	1427.6	24.92
HL18	HL	1	SH	H	1228.24	31.56
HL19	HL	1	SH	H	1427.6	16.24
HL20	HL	1	SH	H	1072.13	19.24
HL61	HL	1	SH	H	1427.6	16.38
HL62	HL	1	SH	H	796.07	19.75
HL63	HL	1	SH	H	758.39	16.59
HL64	HL	1	SH	H	617.15	14.04
HL65	HL	1	SH	H	773	15.92
LC11_2	LC	1	SH	H	948.34	53.94
LC12	LC	1	SH	H	519.74	43.94
LC13	LC	1	SH	H	428.13	35.44
LC15	LC	1	SH	H	948.34	38.4
LC16	LC	1	SH	H	436.44	27.73
LC17	LC	1	SH	H	169.46	19.26
LC18	LC	1	SH	H	948.34	53.76
LC19	LC	1	SH	H	951.09	43.68
LC20	LC	1	SH	H	231.01	13.75
LC21	LC	1	SH	H	265.15	7.8
Lcin1	Lcin	1	SH	H	468.87	7.82
Lcin2	Lcin	1	SH	H	316.26	3.72
Lcin3	Lcin	1	SH	H	754.59	45.14
Lcin4	Lcin	1	SH	H	329.26	21.31
Lcin5	Lcin	1	SH	H	190.91	11.42
Lcin6	Lcin	1	SH	H	268.9	16.61
Lcin7	Lcin	1	SH	H	510.18	39.53
Lcin8	Lcin	1	SH	H	383.41	19.18
Lcin9	Lcin	1	SH	H	296.37	24.12
Lcin10	Lcin	1	SH	H	433.72	28.5
Lcin11	Lcin	1	SH	H	397.35	15.2
Lcin12	Lcin	1	SH	H	471.09	7.39
Lcin13	Lcin	1	SH	H	215.54	3.17
Lcin14	Lcin	1	SH	H	192.73	6.43
Lcin15	Lcin	1	SH	H	311.44	20.77
Lcin16	Lcin	1	SH	H	369.74	20.67
Lcin17	Lcin	1	SH	H	301.07	15.06
Lcin18	Lcin	1	SH	H	560.06	31.31
Lcin19	Lcin	1	SH	H	303.78	14.3
Lcin20	Lcin	1	SH	H	355.85	27.22
Lcin21	Lcin	1	SH	H	417.2	27.82
Lcin22	Lcin	1	SH	H	163.89	5.3
Lcin23	Lcin	1	SH	H	236.93	6.51
Lcin24	Lcin	1	SH	H	223.9	6.15
Lcin25	Lcin	1	SH	H	303.15	11.3
Lcin26	Lcin	1	SH	H	220.33	5.83
Lcin27	Lcin	1	SH	H	142.46	4.05
Lcin28	Lcin	1	SH	H	107.81	3.81
Lcin29	Lcin	1	SH	H	167	3.28
Lcin30	Lcin	1	SH	H	257.63	6.32
Lcin31	Lcin	1	SH	H	124.79	2.45
Lcin32	Lcin	1	SH	H	151.36	4.6
Lcin33	Lcin	1	SH	H	618.35	16.37
Lcin34	Lcin	1	SH	H	366.58	11.14
Lcin35	Lcin	1	SH	H	230.87	4.98
Lcin36	Lcin	1	SH	H	230.85	6.57
Lcin37	Lcin	1	SH	H	207.45	7.12
Lcin38	Lcin	1	SH	H	181.68	5.17
Lcin39	Lcin	1	SH	H	405.9	12.34
Lcin40	Lcin	1	SH	H	375.89	9.58
Lcin41	Lcin	1	SH	H	367.86	14.07
Lcin42	Lcin	1	SH	H	756.14	25.21
Lcin43	Lcin	1	SH	H	246.63	9.43
