# Supplementary material for: Extreme suction attachment performance from specialised insects living in mountain streams (Diptera: Blephariceridae)
Source: eLife. 2021 Nov 3;10:e63250. doi: 10.7554/eLife.63250 (PMC8565926; doi:10.7554/eLife.63250)
Supplement: Figure 5—source data 1. [file elife-63250-fig5-data1.csv]

ID	Species	Collection	Surface	Orientation	Safety_Factor	Max_Force
HL11	HL	1	SH	H	1006.95	20.74
HL12	HL	1	SH	H	1427.6	15.4
HL13	HL	1	SH	H	1153.7	18.33
HL14	HL	1	SH	H	1160.92	24.48
HL15	HL	1	SH	H	1131.19	15.31
HL16	HL	1	SH	H	1427.6	12.88
HL17	HL	1	SH	H	1427.6	24.92
HL18	HL	1	SH	H	1228.24	31.56
HL19	HL	1	SH	H	1427.6	16.24
HL20	HL	1	SH	H	1072.13	19.24
HL61	HL	1	SH	H	1427.6	16.38
HL62	HL	1	SH	H	796.07	19.75
HL63	HL	1	SH	H	758.39	16.59
HL64	HL	1	SH	H	617.15	14.04
HL65	HL	1	SH	H	773	15.92
HL51	HL	1	30H	H	245.86	3.71
HL52	HL	1	30H	H	90.18	2.7
HL54	HL	1	30H	H	138.66	3.01
HL55	HL	1	30H	H	58.89	1.29
HL56	HL	1	30H	H	66.54	1.36
HL57	HL	1	30H	H	60.42	0.89
HL58	HL	1	30H	H	211.6	4.48
HL59	HL	1	30H	H	96.48	2.4
HL60	HL	1	30H	H	74.7	2.23
HL41	HL	1	0p05H	H	311.45	5.83
HL42	HL	1	0p05H	H	478.65	9.53
HL43	HL	1	0p05H	H	389.5	8.59
HL44	HL	1	0p05H	H	488.64	10.97
HL45	HL	1	0p05H	H	381.22	6.54
HL46	HL	1	0p05H	H	1313.69	31.69
HL47	HL	1	0p05H	H	756.42	16.1
HL48	HL	1	0p05H	H	491.76	15.62
HL49	HL	1	0p05H	H	576.9	7.24
HL50	HL	1	0p05H	H	356.4	6.85
Stick1	Stick	1	SH	H	87.47	19.82
Stick2	Stick	1	SH	H	82.93	17.57
Stick3	Stick	1	SH	H	60.89	11.11
Stick4	Stick	1	SH	H	211.96	22.25
Stick5	Stick	1	SH	H	91.41	15.24
Stick6	Stick	1	SH	H	95.11	16.14
Stick7	Stick	1	SH	H	30.28	4.04
Stick8	Stick	1	SH	H	142.31	28.48
Stick9	Stick	1	SH	H	55.68	12.62
Stick10	Stick	1	SH	H	127.05	17.32
Stick21	Stick	1	30H	H	39.35	4.36
Stick22	Stick	1	30H	H	113.72	23.76
Stick23	Stick	1	30H	H	88.37	12.57
Stick24	Stick	1	30H	H	83.86	11.19
Stick25	Stick	1	30H	H	76.35	15.95
Stick26	Stick	1	30H	H	172.98	21.38
Stick27	Stick	1	30H	H	88.64	16.69
Stick28	Stick	1	30H	H	121.89	14.59
Stick29	Stick	1	30H	H	108.5	13.2
Stick30	Stick	1	30H	H	88.46	20.91
Stick11	Stick	1	0p05H	H	2.31	0.47
Stick12	Stick	1	0p05H	H	5.98	1.48
Stick13	Stick	1	0p05H	H	6.25	0.79
Stick14	Stick	1	0p05H	H	11.91	1.95
Stick15	Stick	1	0p05H	H	8.32	1.13
Stick16	Stick	1	0p05H	H	8.52	1.3
Stick17	Stick	1	0p05H	H	2.75	0.48
Stick18	Stick	1	0p05H	H	1.86	0.23
Stick19	Stick	1	0p05H	H	2.52	0.48
Stick20	Stick	1	0p05H	H	18.19	2.23
