# Supplementary material for: Extreme suction attachment performance from specialised insects living in mountain streams (Diptera: Blephariceridae)
Source: eLife. 2021 Nov 3;10:e63250. doi: 10.7554/eLife.63250 (PMC8565926; doi:10.7554/eLife.63250)
Supplement: Table 2—source data 1. [file elife-63250-table2-data1.csv]

ID	Species	Collection	Surface	Orientation	Conservative_stress	Realistic_stress
HL11	HL	1	SH	H	39.47	117.18
HL12	HL	1	SH	H	39.8	118.16
HL13	HL	1	SH	H	39.9	118.45
HL14	HL	1	SH	H	47.74	141.75
HL15	HL	1	SH	H	33.92	100.72
HL16	HL	1	SH	H	28.54	84.74
HL17	HL	1	SH	H	49.85	148.02
HL18	HL	1	SH	H	68.95	204.73
HL19	HL	1	SH	H	31.95	94.86
HL20	HL	1	SH	H	40.14	119.18
HL61	HL	1	SH	H	41.17	122.25
HL62	HL	1	SH	H	32.68	97.02
HL63	HL	1	SH	H	37.4	111.05
HL64	HL	1	SH	H	24.9	73.93
HL65	HL	1	SH	H	32.4	96.19
HL1	HL	1	SV	V	23.12	68.64
HL2	HL	1	SV	V	26.93	79.96
HL3	HL	1	SV	V	12.86	38.17
HL4	HL	1	SV	V	32.89	97.64
HL5	HL	1	SV	V	27.38	81.28
HL6	HL	1	SV	V	31.53	93.61
HL7	HL	1	SV	V	30.59	90.81
HL8	HL	1	SV	V	19.42	57.66
HL9	HL	1	SV	V	11.39	33.82
HL10	HL	1	SV	V	23.68	70.32
LC11_2	LC	1	SH	H	75.04	222.81
LC12	LC	1	SH	H	56.34	167.29
LC13	LC	1	SH	H	35.61	105.73
LC15	LC	1	SH	H	44.1	101.48
LC16	LC	1	SH	H	31.98	94.96
LC17	LC	1	SH	H	21.56	64.02
LC18	LC	1	SH	H	56.23	129.38
LC19	LC	1	SH	H	63.56	146.69
LC20	LC	1	SH	H	17.06	50.65
LC21	LC	1	SH	H	10.76	31.96
LC1	LC	1	SV	V	8.36	99.09
LC2	LC	1	SV	V	63.84	709.59
LC3	LC	1	SV	V	72.94	815.77
LC4	LC	1	SV	V	53.62	788.55
LC5	LC	1	SV	V	19.22	528.62
LC6	LC	1	SV	V	58.2	810.31
LC7	LC	1	SV	V	13	166.29
LC8	LC	1	SV	V	56.67	617.3
LC9	LC	1	SV	V	12.95	187.53
LC10	LC	1	SV	V	9.7	99.12
LC11_1	LC	1	SV	V	76.89	815.77
